# Supplementary material
Source: publisher site journal article supplement (https://www.dovepress.com/article/367020)
Supplement: Supplementary file 1 [file get_supplementary_file.php]

# Identification of novel tRNA-Leu-CAA derived tsRNAs for the diagnosis and prognosis of diffuse gliomas

Bing Xu<sup>1,#</sup>, Jian Liang<sup>1,#</sup>, Hecun Zou<sup>2,#</sup>, Jingwen Wang<sup>2</sup>, Yubo Xiong<sup>1,3\*</sup>, Jiao Pei<sup>1,\*</sup>

<sup>1</sup> Xiangyang Central Hospital, Affiliated Hospital of Hubei University of Arts and Science, Xiangyang, 441021, Hubei, China

<sup>2</sup> Institute of Life Sciences, Chongqing Medical University, Chongqing, 400016, China.

<sup>3</sup> Department of Neurosurgery, General Hospital of the Yangtze River Shipping, Wuhan Brain Hospital, Wuhan, 430010, Hubei, China.

# Bing Xu, Jian Liang and Hecun Zou are contributed equally to this work.

\* Correspondence: Jiao Pei, E-mail: [Ajiao2012@outlook.com](mailto:Ajiao2012@outlook.com); Yubo Xiong, E-mail: [fengshu525@163.com](mailto:fengshu525@163.com).

## Supplementary Materials

### Figure titles and legends in the supplemental information files

**Figure S1.** The enrichment analyses of tRFdb-3012b -related genes within TCGA-LGG datasets. (**A-left**) The top gene ontology (GO) terms, including biological process, CC (cellular component) and MF (molecular function), as well as the top KEGG pathway for tRFdb-3012b-related genes. (**A-right**) The correlation scatter-plots of tRFdb-3012b and its correlated-genes (LUC7L, HDAC10, and OSGEP). (**B-left**) GSEA (gene set enrichment analysis) plots of three molecular signatures (astrocyte, microglia, and STIM treatment response signature), (**B-right**) the scatter plots for tRFdb-3012b and its correlated-genes (SNRNP70, HOOK2 and ING5).

## A Go enrichment of top genes for tRFdb-3012b

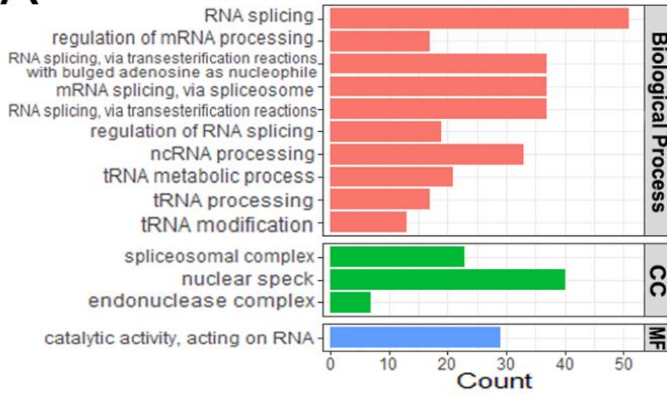

## KEGG enrichment of top genes for tRFdb-3012b

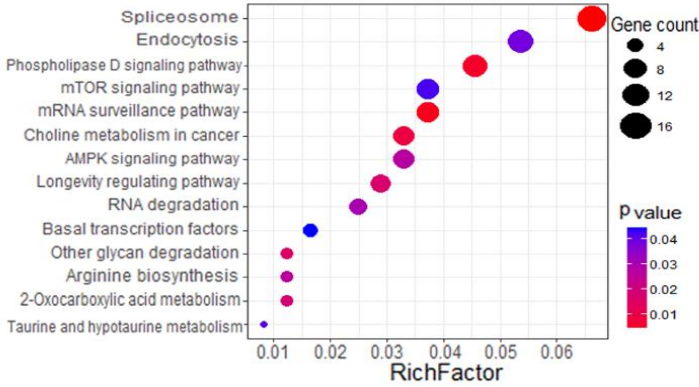

## B

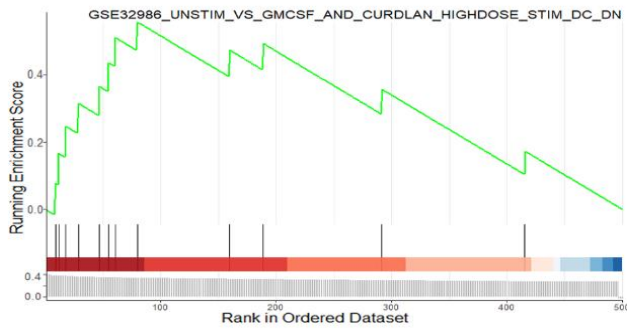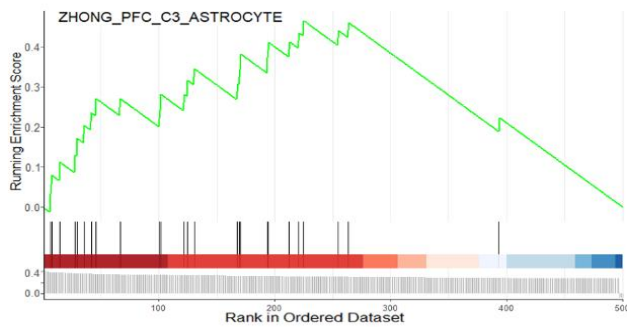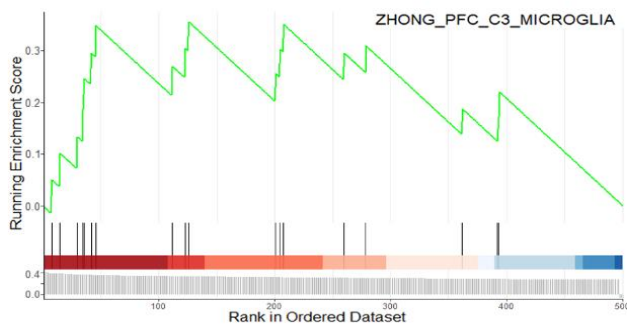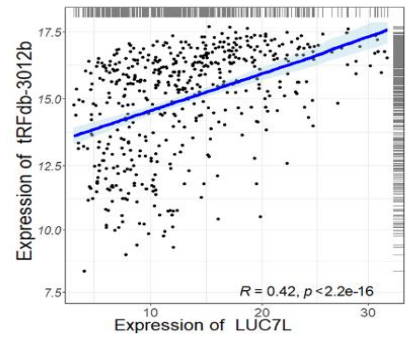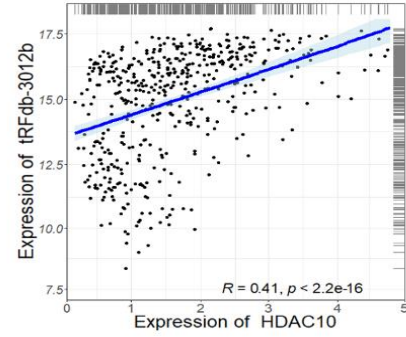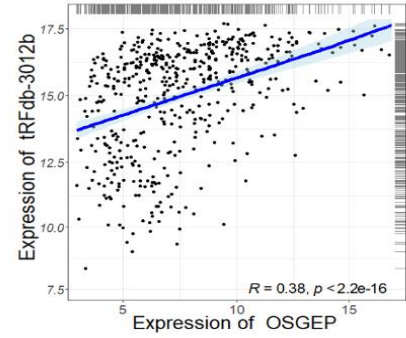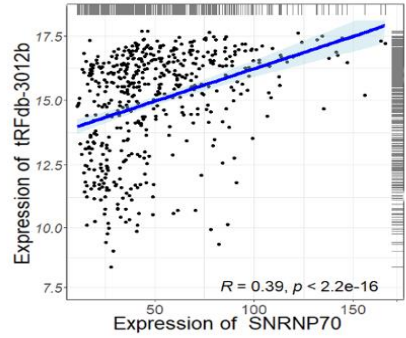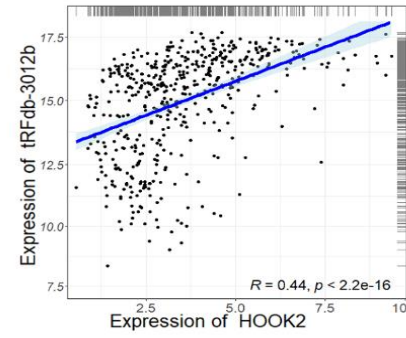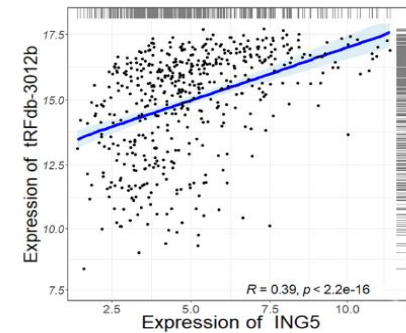

**Figure S2.** The enrichment analyses of ts-26 related genes within TCGA-LGG datasets. **(A)** The top gene ontology (GO) terms, including biological process, CC (cellular component) and MF (molecular function), as well as the top KEGG pathway for ts-26 related genes. The correlation scatter-plots of ts-26 and its correlated-genes (LUC7L, HOOK2 and HDAC10). **(B)** GSEA (gene set enrichment analysis) plots of three molecular signatures (CD11B interferon treatment response signature).

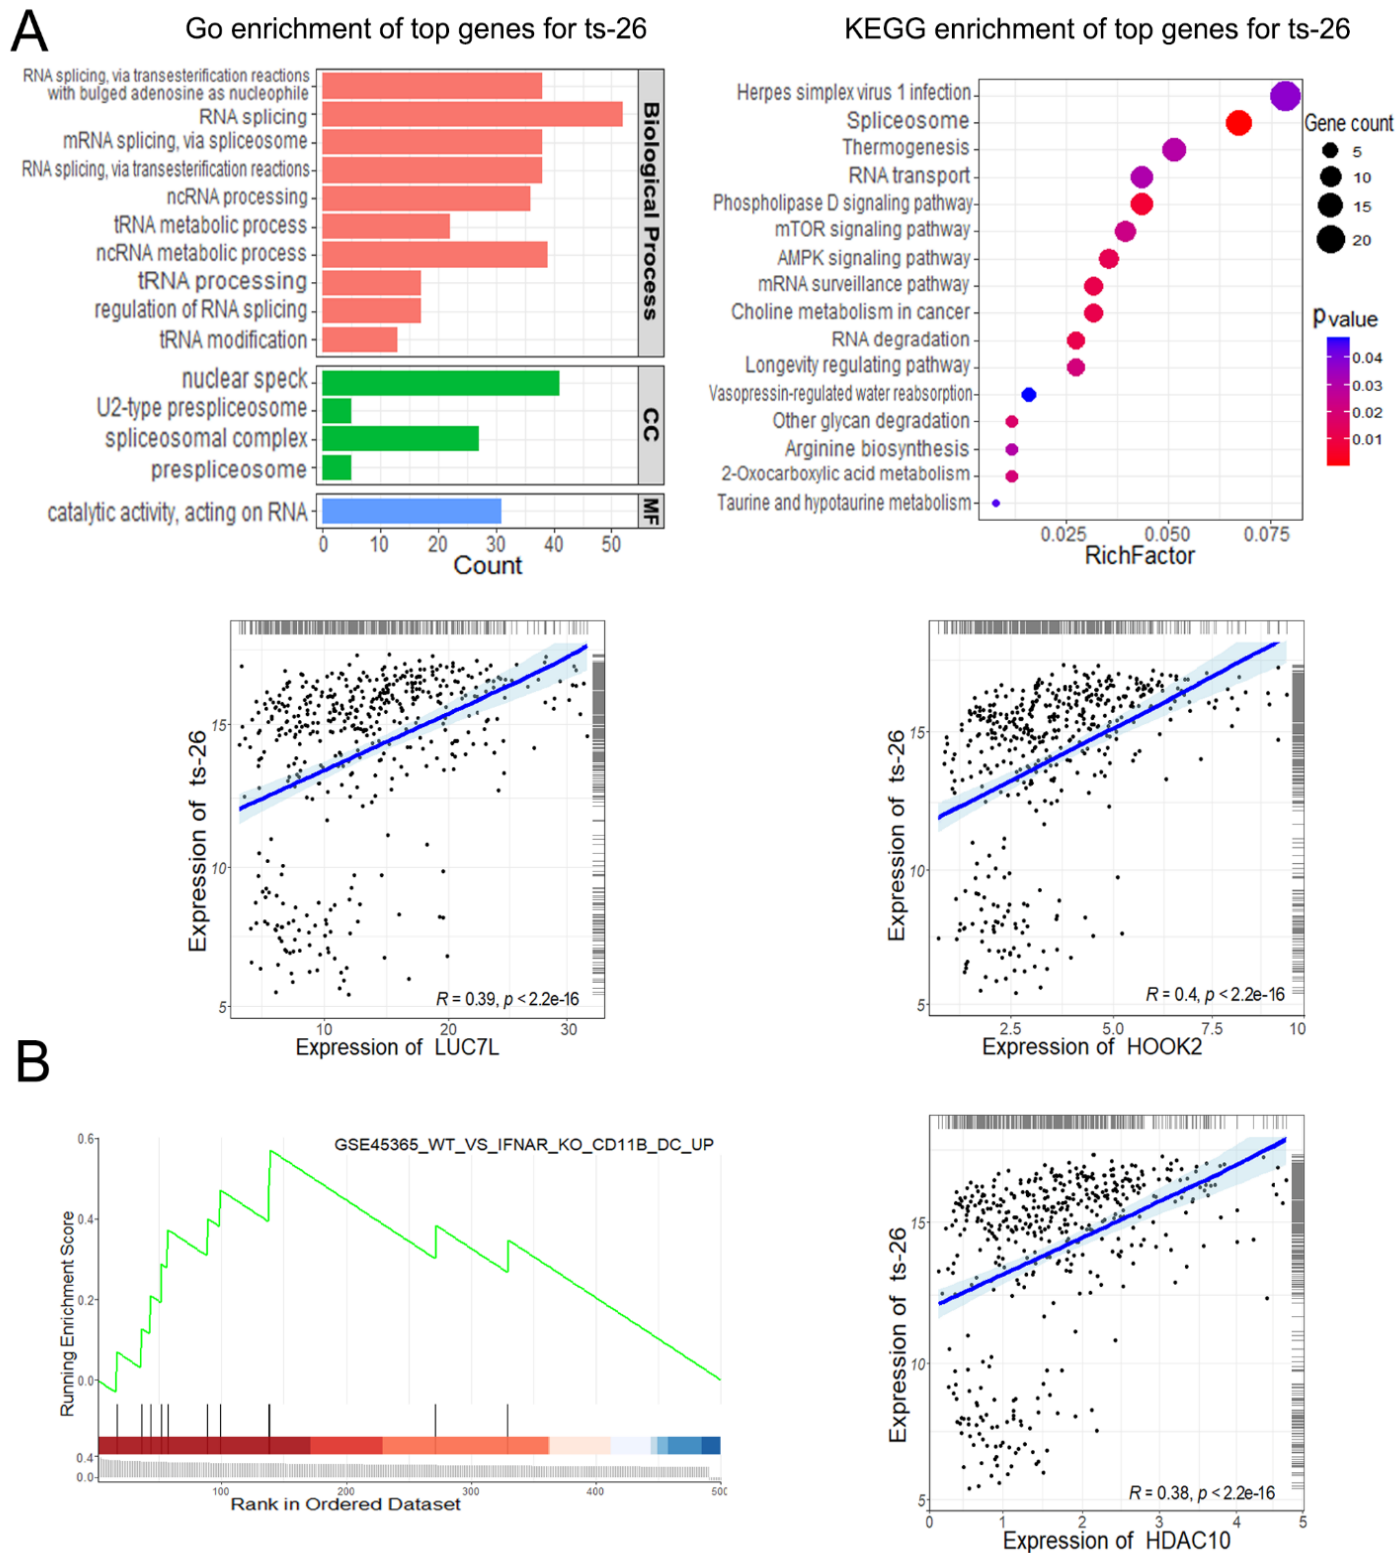

## Table titles and footnotes in the supplemental information files

**Table S1.** A summary of the identified tsRNAs with available expression abundance in glioma datasets.

| tsRNA               | types   | median | mean   | min    | max    |
|---------------------|---------|--------|--------|--------|--------|
| tRFdb-3003a         | 3'-tRF  | 14.289 | 13.877 | 7.7285 | 18.602 |
| tRFdb-3003b         | 3'-tRF  | 13.917 | 13.506 | 7.3585 | 18.23  |
| tRFdb-3020a         | 3'-tRF  | 14.574 | 14.707 | 9.9196 | 18.193 |
| tRFdb-3012a         | 3'-tRF  | 15.872 | 15.318 | 7.8317 | 17.984 |
| tRFdb-3012b         | 3'-tRF  | 15.632 | 15.134 | 8.2924 | 17.694 |
| tRFdb-3029a         | 3'-tRF  | 13.76  | 13.731 | 8.207  | 17.833 |
| tRFdb-3029b         | 3'-tRF  | 12.435 | 12.383 | 7.2217 | 17.34  |
| tRFdb-5005b         | 5'-tRF  | 12.039 | 11.909 | 7.0386 | 17.829 |
| tRFdb-5005c         | 5'-tRF  | 11.729 | 11.598 | 6.7309 | 17.519 |
| tRFdb-5026a         | 5'-tRF  | 12.039 | 11.976 | 7.2074 | 18.27  |
| 5P_tRNA-Lys-TTT-3-1 | 5'U-tRF | 12.157 | 12.06  | 7.3584 | 18.142 |
| tRFdb-3030a         | 3'-tRF  | 17.162 | 17.173 | 9.1163 | 18.878 |
| tRFdb-3030b         | 3'-tRF  | 16.872 | 16.884 | 8.8274 | 18.589 |
| tRFdb-3033a         | 3'-tRF  | 12.217 | 12.074 | 7.5631 | 18.41  |
| tRFdb-3006a         | 3'-tRF  | 12.478 | 12.355 | 7.0734 | 17.775 |
| tRFdb-3006b         | 3'-tRF  | 12.106 | 11.983 | 6.7046 | 17.403 |
| tRFdb-3016a         | 3'-tRF  | 11.708 | 11.654 | 6.8395 | 16.209 |
| tRFdb-3016b         | 3'-tRF  | 11.497 | 11.442 | 6.63   | 15.997 |
| ts-96               | tRF-1   | 13.33  | 13.175 | 5.5544 | 17.608 |
| tRFdb-5002a         | 5'-tRF  | 15.189 | 15.176 | 8.5685 | 18.608 |
| tRFdb-5002b         | 5'-tRF  | 14.749 | 14.735 | 8.1293 | 18.167 |
| tRFdb-5002c         | 5'-tRF  | 14.043 | 14.029 | 7.4263 | 17.461 |
| tRFdb-3001a         | 3'-tRF  | 11.955 | 11.89  | 7.2823 | 18.193 |
| tRFdb-3013a         | 3'-tRF  | 11.417 | 11.343 | 6.662  | 16.41  |
| tRFdb-3013b         | 3'-tRF  | 11.045 | 10.971 | 6.2942 | 16.039 |
| tRFdb-3021a         | 3'-tRF  | 11.84  | 11.739 | 6.1712 | 15.3   |
| ts-26               | tRF-1   | 15.246 | 14.389 | 5.3882 | 17.346 |
| tRFdb-3015a         | 3'-tRF  | 13.386 | 13.202 | 6.7256 | 16.171 |
| tRFdb-3015b         | 3'-tRF  | 13.174 | 12.99  | 6.5163 | 15.959 |
| tRFdb-5027b         | 5'-tRF  | 10.364 | 10.27  | 6.2337 | 15.968 |
| tRFdb-5027c         | 5'-tRF  | 9.9282 | 9.8448 | 5.8097 | 15.537 |
| tRFdb-5017a         | 5'-tRF  | 12.049 | 11.929 | 6.8707 | 17.183 |
| tRFdb-5017b         | 5'-tRF  | 11.165 | 11.048 | 5.9966 | 16.298 |
| tRFdb-3024a         | 3'-tRF  | 11.316 | 11.384 | 6.5174 | 15.44  |
| tRFdb-3025a         | 3'-tRF  | 11.316 | 11.384 | 6.5174 | 15.44  |
| ts-58               | tRF-1   | 10.5   | 10.427 | 4.4122 | 14.612 |
| tRFdb-3024b         | 3'-tRF  | 10.812 | 10.846 | 6.2314 | 15.119 |

|                     |         |        |        |        |        |
|---------------------|---------|--------|--------|--------|--------|
| tRFdb-3025b         | 3'-tRF  | 10.812 | 10.846 | 6.2314 | 15.119 |
| tRFdb-3002b         | 3'-tRF  | 10.222 | 10.192 | 4.7455 | 14.543 |
| tRFdb-3002a         | 3'-tRF  | 10.513 | 10.485 | 5.0252 | 14.833 |
| ts-42               | tRF-1   | 10.812 | 10.789 | 6.5465 | 14.817 |
| tRFdb-5026b         | 5'-tRF  | 10.96  | 10.945 | 4.6838 | 17.915 |
| tRFdb-5026c         | 5'-tRF  | 10.529 | 10.514 | 4.2726 | 17.485 |
| tRFdb-1024          | tRF-1   | 11.178 | 11.204 | 6.3523 | 14.775 |
| tRFdb-1036          | tRF-1   | 11.343 | 11.253 | 6.3523 | 14.715 |
| ts-50               | tRF-1   | 10.349 | 10.323 | 5.4953 | 17.505 |
| tRFdb-5024a         | 5'-tRF  | 11.846 | 11.784 | 6.5754 | 17.398 |
| 5P_tRNA-Val-CAC-1-1 | 5'U-tRF | 10.167 | 10.017 | 5.4457 | 14.999 |
| tRFdb-3008a         | 3'-tRF  | 10.939 | 10.983 | 6.6031 | 17.1   |
| tRFdb-3008b         | 3'-tRF  | 10.567 | 10.611 | 6.2355 | 16.729 |
| tRFdb-5024b         | 5'-tRF  | 11.287 | 11.3   | 5.1605 | 16.928 |
| tRFdb-5009a         | 5'-tRF  | 10.985 | 11.213 | 6.6766 | 17.637 |
| tRFdb-5009b         | 5'-tRF  | 10.369 | 10.597 | 6.0674 | 17.02  |
| tRFdb-5009c         | 5'-tRF  | 9.9389 | 10.167 | 5.6443 | 16.589 |
| ts-110              | tRF-1   | 10.403 | 10.383 | 4.8341 | 14.93  |
| tRFdb-5012b         | 5'-tRF  | 9.7315 | 9.7027 | 6.0164 | 13.164 |
| tRFdb-5013b         | 5'-tRF  | 9.8459 | 9.8271 | 6.1457 | 13.238 |
| tRFdb-5012a         | 5'-tRF  | 10.04  | 10.075 | 6.4467 | 13.286 |
| tRFdb-3004a         | 3'-tRF  | 10.712 | 10.714 | 6.0841 | 13.863 |
| ts-1                | tRF-1   | 9.567  | 9.5756 | 4.4045 | 14.824 |
| tRFdb-5001a         | 5'-tRF  | 10.258 | 10.216 | 6.2622 | 14.599 |
| tRFdb-5011a         | 5'-tRF  | 10.182 | 10.179 | 6.2674 | 13.557 |
| ts-6                | tRF-1   | 9.69   | 9.6345 | 5.6743 | 12.731 |
| 5P_tRNA-Tyr-GTA-2-1 | 5'U-tRF | 9.7797 | 9.7497 | 5.8534 | 14.184 |
| tRFdb-3011a         | 3'-tRF  | 10.034 | 9.9601 | 5.0252 | 14.102 |
| tRFdb-3011b         | 3'-tRF  | 9.745  | 9.6711 | 4.7455 | 13.813 |
| tRFdb-3026a         | 3'-tRF  | 10.086 | 10.013 | 5.5944 | 15.847 |
| tRFdb-3026b         | 3'-tRF  | 9.7964 | 9.7243 | 5.3115 | 15.557 |
| tRFdb-3007a         | 3'-tRF  | 11.286 | 11.264 | 6.7325 | 16.689 |
| ts-30               | tRF-1   | 9.9619 | 9.9113 | 5.6371 | 13.627 |
| 5P_tRNA-Arg-ACG-2-1 | 5'U-tRF | 10.009 | 9.998  | 5.8038 | 14.576 |
| tRFdb-5013c         | 5'-tRF  | 9.1837 | 9.1507 | 5.6803 | 12.318 |
| tRFdb-5014a         | 5'-tRF  | 10.171 | 10.162 | 5.9532 | 14.728 |
| ts-75               | tRF-1   | 10.737 | 10.684 | 4.9681 | 16.07  |
| 5P_tRNA-Gly-CCC-2-1 | 5'U-tRF | 9.4499 | 9.3518 | 4.8167 | 12.029 |
| tRFdb-5007a         | 5'-tRF  | 9.8585 | 9.7597 | 5.2189 | 12.444 |
| tRFdb-5007c         | 5'-tRF  | 8.8601 | 8.7618 | 4.2571 | 11.444 |
| tRFdb-3027a         | 3'-tRF  | 9.5616 | 9.5401 | 5.1052 | 14.248 |
| tRFdb-5004b         | 5'-tRF  | 9.6525 | 9.4623 | 4.6843 | 13.421 |
| tRFdb-5004c         | 5'-tRF  | 9.1584 | 8.9688 | 4.2123 | 12.927 |
| ts-88               | tRF-1   | 8.8334 | 8.7758 | 4.3935 | 15.217 |
| tRFdb-3027b         | 3'-tRF  | 9.0684 | 9.0274 | 4.7455 | 12.236 |

|                     |         |        |        |        |        |
|---------------------|---------|--------|--------|--------|--------|
| 5P_tRNA-Pro-AGG-2-1 | 5'U-tRF | 9.3642 | 9.3303 | 5.336  | 12.826 |
| tRFdb-3014a         | 3'-tRF  | 10.099 | 10.101 | 6.1712 | 14.058 |
| tRFdb-3014b         | 3'-tRF  | 9.8102 | 9.8121 | 5.8861 | 13.769 |
| tRFdb-5016a         | 5'-tRF  | 9.9352 | 9.9739 | 4.7688 | 14.769 |
| tRFdb-1030          | tRF-1   | 10.386 | 10.343 | 6.4309 | 14.299 |
| ts-81               | tRF-1   | 9.234  | 9.2251 | 4.5075 | 14.269 |
| 5P_tRNA-Leu-CAA-4-1 | 5'U-tRF | 9.2282 | 9.1928 | 4.3712 | 12.446 |
| ts-38               | tRF-1   | 9.0999 | 9.0145 | 4.0666 | 12.801 |
| tRFdb-3009a         | 3'-tRF  | 10.577 | 10.52  | 7.0142 | 13.459 |
| tRFdb-3009b         | 3'-tRF  | 10.298 | 10.254 | 6.7272 | 13.17  |
| tRFdb-5015a         | 5'-tRF  | 10.102 | 10.126 | 4.9681 | 14.976 |
| tRFdb-5005a         | 5'-tRF  | 9.6388 | 9.6158 | 5.5495 | 14.643 |
| ts-55               | tRF-1   | 9.2521 | 9.2813 | 4.6092 | 13.253 |
| 5P_tRNA-Lys-CTT-2-1 | 5'U-tRF | 9.3013 | 9.2306 | 4.9561 | 14.228 |
| 5P_tRNA-Val-AAC-1-1 | 5'U-tRF | 9.1167 | 9.0206 | 4.3712 | 11.897 |
| tRFdb-3017a         | 3'-tRF  | 10.784 | 10.85  | 6.4444 | 14.008 |
| tRFdb-5008b         | 5'-tRF  | 8.907  | 8.9358 | 4.6838 | 13.165 |
| tRFdb-5003b         | 5'-tRF  | 9.6314 | 9.7253 | 4.6843 | 14.447 |
| tRFdb-5003c         | 5'-tRF  | 9.1374 | 9.2316 | 4.2123 | 13.952 |
| tRFdb-3017b         | 3'-tRF  | 10.635 | 10.658 | 6.2355 | 13.78  |
| ts-105              | tRF-1   | 10.355 | 10.357 | 5.9444 | 13.484 |
| tRFdb-3005a         | 3'-tRF  | 10.175 | 10.391 | 6.0841 | 13.456 |
| tRFdb-5008c         | 5'-tRF  | 8.4198 | 8.4984 | 5.2912 | 12.782 |
| ts-7                | tRF-1   | 8.6798 | 8.7005 | 4.6092 | 11.497 |
| tRFdb-3004b         | 3'-tRF  | 9.8097 | 10.027 | 5.7184 | 13.084 |
| tRFdb-3005b         | 3'-tRF  | 9.8097 | 10.027 | 5.7184 | 13.084 |
| ts-9                | tRF-1   | 8.9967 | 9.1093 | 5.2613 | 15.541 |
| tRFdb-3022a         | 3'-tRF  | 9.4654 | 9.6361 | 5.7246 | 16.015 |
| tRFdb-3022b         | 3'-tRF  | 9.1764 | 9.3472 | 5.4412 | 15.725 |
| 5P_tRNA-Gly-GCC-2-1 | 5'U-tRF | 9.4724 | 9.3014 | 4.3712 | 12.608 |
| 5P_tRNA-Pro-CGG-1-1 | 5'U-tRF | 8.8465 | 8.9272 | 5.0434 | 12.352 |
| 5P_tRNA-Gly-GCC-2-2 | 5'U-tRF | 9.3159 | 9.1779 | 4.3712 | 12.781 |
| tRFdb-3023a         | 3'-tRF  | 9.223  | 9.1239 | 6.6404 | 13.343 |
| ts-36               | tRF-1   | 8.6915 | 8.6762 | 5.6192 | 13.689 |
| ts-48               | tRF-1   | 8.9926 | 9.0153 | 5.6057 | 13.744 |
| tRFdb-3023b         | 3'-tRF  | 8.8522 | 8.7474 | 6.2726 | 12.971 |
| 5P_tRNA-Ala-AGC-8-1 | 5'U-tRF | 9.2922 | 9.2335 | 5.9201 | 12.286 |
| tRFdb-5023a         | 5'-tRF  | 9.2351 | 9.083  | 4.6792 | 13.462 |
| ts-60               | tRF-1   | 8.8628 | 8.7587 | 5.3064 | 12.098 |
| 5P_tRNA-Gly-TCC-2-1 | 5'U-tRF | 8.853  | 8.8991 | 4.3712 | 13.038 |
| tRFdb-5020a         | 5'-tRF  | 9.5852 | 9.5467 | 4.8648 | 13.623 |
| 5P_tRNA-Lys-TTT-3-2 | 5'U-tRF | 9.1669 | 9.0843 | 6.0445 | 12.21  |
| 5P_tRNA-Val-CAC-4-1 | 5'U-tRF | 9.2205 | 9.1197 | 5.0434 | 15.321 |
| 5P_tRNA-His-GTG-1-1 | 5'U-tRF | 8.9397 | 8.8139 | 4.3712 | 13.89  |
| ts-74               | tRF-1   | 8.3921 | 8.2928 | 5.4844 | 12.033 |

|                     |         |        |        |        |        |
|---------------------|---------|--------|--------|--------|--------|
| 5P_tRNA-Gly-TCC-2-6 | 5'U-tRF | 8.7462 | 8.677  | 4.9193 | 12.852 |
| tRFdb-3031a         | 3'-tRF  | 9.2626 | 9.7787 | 5.1052 | 16.055 |
| tRFdb-3031b         | 3'-tRF  | 8.445  | 8.9629 | 4.3175 | 15.236 |
| tRFdb-1032          | tRF-1   | 9.0899 | 8.889  | 5.3595 | 13.079 |
| tRFdb-5023b         | 5'-tRF  | 8.453  | 8.3676 | 4.18   | 12.939 |
| 5P_tRNA-Arg-TCT-1-1 | 5'U-tRF | 8.8883 | 8.7658 | 4.3712 | 13.55  |
| ts-65               | tRF-1   | 8.5976 | 8.5792 | 5.2062 | 11.564 |
| ts-68               | tRF-1   | 8.3901 | 8.3875 | 5.6743 | 11.063 |
| tRFdb-5010a         | 5'-tRF  | 10.242 | 10.308 | 5.9831 | 15.283 |
| ts-89               | tRF-1   | 8.3331 | 8.3557 | 4.8329 | 11.366 |
| tRFdb-1040          | tRF-1   | 8.8222 | 8.7908 | 5.3224 | 11.044 |
| ts-12               | tRF-1   | 8.6215 | 8.5103 | 4.555  | 13.501 |
| 5P_tRNA-His-GTG-1-9 | 5'U-tRF | 8.3617 | 8.383  | 4.9193 | 11.855 |
| ts-67               | tRF-1   | 8.046  | 7.9664 | 5.4875 | 10.433 |
| ts-47               | tRF-1   | 7.6406 | 7.6289 | 3.8207 | 11.629 |
| tRFdb-3021b         | 3'-tRF  | 8.5908 | 8.6888 | 4.9103 | 12.738 |
| ts-43               | tRF-1   | 7.654  | 7.6284 | 3.578  | 11.015 |
| ts-80               | tRF-1   | 7.1167 | 6.9856 | 3.4393 | 9.3207 |
| 5P_tRNA-His-GTG-1-7 | 5'U-tRF | 8.4476 | 8.3936 | 4.3712 | 12.775 |
| ts-109              | tRF-1   | 8.1126 | 7.9469 | 4.0666 | 10.517 |
| ts-53               | tRF-1   | 7.8624 | 7.85   | 4.4891 | 10.262 |
| ts-108              | tRF-1   | 6.9849 | 6.8941 | 3.8339 | 12.514 |
| 5P_tRNA-Leu-CAA-1-1 | 5'U-tRF | 8.6533 | 8.5797 | 4.3712 | 11.943 |
| tRFdb-1031          | tRF-1   | 8.5129 | 8.4614 | 4.6792 | 11.257 |
| 5P_tRNA-Asn-GTT-1-1 | 5'U-tRF | 8.619  | 8.5367 | 5.0434 | 12.999 |
| tRFdb-3019a         | 3'-tRF  | 8.277  | 8.2112 | 5.9532 | 10.432 |
| tRFdb-3019b         | 3'-tRF  | 7.9885 | 7.9229 | 5.6689 | 10.143 |
| tRFdb-5021b         | 5'-tRF  | 8.7084 | 8.6404 | 5.7089 | 13.151 |
| ts-104              | tRF-1   | 7.8698 | 7.8629 | 4.8898 | 11.425 |
| 5P_tRNA-Glu-TTC-1-1 | 5'U-tRF | 8.8479 | 8.8233 | 4.9561 | 11.688 |
| ts-63               | tRF-1   | 7.9866 | 7.9879 | 5.249  | 11.8   |
| tRFdb-5021a         | 5'-tRF  | 9.1148 | 9.0064 | 6.0653 | 11.655 |
| ts-51               | tRF-1   | 7.8389 | 7.8288 | 4.9902 | 11.444 |
| tRFdb-5029a         | 5'-tRF  | 8.9211 | 8.9891 | 5.1034 | 11.84  |
| tRFdb-5029b         | 5'-tRF  | 8.5683 | 8.6365 | 4.7614 | 11.486 |
| ts-23               | tRF-1   | 9.1616 | 9.065  | 4.5639 | 12.39  |

**Table S2.** The expression profiles of tRNA-Leu-CAA derived tsRNAs with in glioma samples.

| barcode          | tRFdb-3012a | tRFdb-3012b | tRFdb-5023a | ts-26  |
|------------------|-------------|-------------|-------------|--------|
| TCGA-CS-4938-01B | 15.476      | 15.215      | NA          | 14.789 |
| TCGA-CS-4941-01A | 13.452      | 13.163      | 10.623      | NA     |

|                  |        |        |        |        |
|------------------|--------|--------|--------|--------|
| TCGA-CS-4942-01A | 13.641 | 13.352 | 9.4909 | NA     |
| TCGA-CS-4943-01A | 12.623 | 12.471 | NA     | NA     |
| TCGA-CS-4944-01A | 15.05  | 14.811 | 8.4043 | 13.86  |
| TCGA-CS-5390-01A | 13.622 | 13.332 | 9.7933 | NA     |
| TCGA-CS-5393-01A | 13.792 | 13.503 | NA     | NA     |
| TCGA-CS-5394-01A | 12.785 | 12.495 | NA     | NA     |
| TCGA-CS-5395-01A | 17.616 | 17.331 | NA     | 16.962 |
| TCGA-CS-5396-01A | 13.152 | 12.962 | 9.5164 | NA     |
| TCGA-CS-5397-01A | 11.44  | 11.203 | NA     | 8.6357 |
| TCGA-CS-6186-01A | 12.096 | 11.807 | 8.6846 | 9.8753 |
| TCGA-CS-6188-01A | 15.126 | 14.847 | 7.1848 | 14.447 |
| TCGA-CS-6290-01A | 8.9338 | 11.227 | NA     | 7.7153 |
| TCGA-CS-6666-01A | 16.907 | 16.632 | NA     | 16.07  |
| TCGA-CS-6667-01A | 16.431 | 16.179 | NA     | 15.37  |
| TCGA-CS-6668-01A | 15.977 | 15.688 | NA     | 15.34  |
| TCGA-CS-6669-01A | 12.184 | 12.309 | NA     | 10.225 |
| TCGA-CS-6670-01A | 13.839 | 13.714 | 8.5049 | 12.694 |
| TCGA-DB-5270-01A | 14.675 | 14.429 | NA     | 8.9963 |
| TCGA-DB-5273-01A | 11.759 | 12.055 | NA     | 9.1239 |
| TCGA-DB-5274-01A | 16.602 | 16.313 | NA     | 15.687 |
| TCGA-DB-5275-01A | 15.965 | 15.675 | NA     | 14.905 |
| TCGA-DB-5277-01A | 13.933 | 13.644 | NA     | 10.489 |
| TCGA-DB-5278-01A | 16.827 | 16.559 | NA     | 16.146 |
| TCGA-DB-5279-01A | 16.299 | 16.082 | 8.4901 | 15.627 |
| TCGA-DB-5280-01A | 14.795 | 14.621 | NA     | NA     |
| TCGA-DB-5281-01A | 16.173 | 16.045 | NA     | 15.143 |
| TCGA-DB-A4X9-01A | 14.578 | 14.451 | NA     | 13.575 |
| TCGA-DB-A4XA-01A | 14.847 | 14.895 | NA     | 14.006 |
| TCGA-DB-A4XB-01A | 16.504 | 16.215 | NA     | 15.741 |
| TCGA-DB-A4XC-01A | 14.525 | 14.676 | 9.8892 | 13.835 |
| TCGA-DB-A4XD-01A | 16.27  | 16.001 | NA     | 15.352 |
| TCGA-DB-A4XE-01A | 16.66  | 16.371 | NA     | 15.892 |
| TCGA-DB-A4XF-01A | 15.804 | 15.57  | 10.302 | 14.92  |
| TCGA-DB-A4XG-01A | 15.129 | 14.892 | NA     | 13.737 |
| TCGA-DB-A4XH-01A | 14.893 | 14.796 | 9.0884 | 11.738 |
| TCGA-DB-A64L-01A | 15.917 | 15.628 | NA     | 15.206 |
| TCGA-DB-A64O-01A | 14.919 | 14.919 | NA     | 14.111 |
| TCGA-DB-A64P-01A | 16.997 | 16.707 | NA     | 16.289 |
| TCGA-DB-A64Q-01A | 15.703 | 15.414 | 11.016 | 14.731 |
| TCGA-DB-A64R-01A | 17.199 | 17.003 | NA     | 16.462 |
| TCGA-DB-A64S-01A | 16.75  | 16.461 | NA     | 16.113 |
| TCGA-DB-A64U-01A | 16.929 | 16.64  | NA     | 16.235 |
| TCGA-DB-A64V-01A | 14.959 | 14.669 | 12.321 | 14.321 |
| TCGA-DB-A64W-01A | 16.784 | 16.63  | NA     | 16.023 |
| TCGA-DB-A64X-01A | 15.993 | 15.738 | NA     | 15.008 |



|                  |        |        |        |        |
|------------------|--------|--------|--------|--------|
| TCGA-DB-A75K-01A | 17.612 | 17.337 | 8.8543 | 16.927 |
| TCGA-DB-A75L-01A | 17.064 | 16.774 | NA     | 16.426 |
| TCGA-DB-A75O-01A | 15.843 | 15.605 | NA     | 15.176 |
| TCGA-DB-A75P-01A | 14.113 | 14.196 | NA     | 13.295 |
| TCGA-DH-5140-01A | 16.519 | 16.229 | NA     | 15.573 |
| TCGA-DH-5141-01A | 16.489 | 16.215 | NA     | 15.259 |
| TCGA-DH-5142-01A | 13.535 | 13.246 | 9.3851 | 8.5794 |
| TCGA-DH-5143-01A | 13.408 | 13.119 | NA     | NA     |
| TCGA-DH-5144-01A | 11.838 | 11.811 | NA     | NA     |
| TCGA-DH-A669-01A | 15.559 | 15.292 | NA     | 14.76  |
| TCGA-DH-A66B-01A | 16.369 | 16.111 | NA     | 15.566 |
| TCGA-DH-A66D-01A | 16.39  | 16.101 | NA     | 15.547 |
| TCGA-DH-A66F-01A | 16.997 | 16.708 | NA     | 16.331 |
| TCGA-DH-A66G-01A | 16.718 | 16.448 | NA     | 15.983 |
| TCGA-DH-A7UR-01A | 16.756 | 16.482 | 10.419 | 15.95  |
| TCGA-DH-A7US-01A | 17.203 | 16.952 | NA     | 16.506 |
| TCGA-DH-A7UT-01A | 17.637 | 17.354 | NA     | 16.961 |
| TCGA-DH-A7UU-01A | 16.826 | 16.546 | NA     | 16.098 |
| TCGA-DH-A7UV-01A | 17.584 | 17.298 | NA     | 16.902 |
| TCGA-DU-5847-01A | 15.053 | 14.805 | 6.9859 | 14.347 |
| TCGA-DU-5849-01A | 11.42  | 11.616 | NA     | 6.8877 |
| TCGA-DU-5852-01A | 13.671 | 13.435 | NA     | 13.01  |
| TCGA-DU-5853-01A | 16.58  | 16.329 | 9.3559 | 15.917 |
| TCGA-DU-5854-01A | 13.116 | 12.847 | 5.2317 | 12.468 |
| TCGA-DU-5855-01A | 10.336 | 11.268 | NA     | NA     |
| TCGA-DU-5870-01A | 16.102 | 15.813 | NA     | 15.465 |
| TCGA-DU-5871-01A | 11.683 | 11.616 | 9.2695 | 7.8809 |
| TCGA-DU-5872-01A | 9.6051 | 10.093 | NA     | 7.7501 |
| TCGA-DU-5874-01A | 10.283 | 10.409 | NA     | 6.0811 |
| TCGA-DU-6392-01A | 8.26   | 8.2924 | 5.4584 | 6.6325 |
| TCGA-DU-6393-01A | 16.884 | 16.604 | NA     | 16.231 |
| TCGA-DU-6394-01A | 9.954  | 9.7678 | NA     | 5.5905 |
| TCGA-DU-6395-01A | 11.36  | 11.738 | 9.4443 | 8.2247 |
| TCGA-DU-6396-01A | 10.276 | 9.9868 | NA     | 7.0634 |
| TCGA-DU-6397-01A | 9.1023 | 9.3429 | 6.1206 | 6.3106 |
| TCGA-DU-6399-01A | 10.477 | 11.144 | 7.5664 | 7.3452 |
| TCGA-DU-6400-01A | 9.2837 | 8.9947 | NA     | NA     |
| TCGA-DU-6401-01A | 11.459 | 11.639 | NA     | 9.7076 |
| TCGA-DU-6402-01A | 10.519 | 10.307 | 8.5215 | 8.0376 |
| TCGA-DU-6403-01A | 8.3977 | 10.176 | NA     | 5.467  |
| TCGA-DU-6404-01A | 9.8915 | 10.087 | 6.7514 | 6.9424 |
| TCGA-DU-6405-01A | 9.8939 | 10.221 | 7.1655 | 6.3657 |
| TCGA-DU-6406-01A | 9.167  | 9.2733 | 7.0971 | 7.6085 |
| TCGA-DU-6407-01A | 15.585 | 15.366 | 7.7337 | 14.897 |
| TCGA-DU-6408-01A | 10.203 | 10.236 | NA     | NA     |

|                  |        |        |        |        |
|------------------|--------|--------|--------|--------|
| TCGA-DU-6410-01A | 16.324 | 16.059 | 7.2277 | 15.657 |
| TCGA-DU-6542-01A | 11.28  | 10.99  | NA     | NA     |
| TCGA-DU-7006-01A | 15.486 | 15.209 | NA     | 14.778 |
| TCGA-DU-7007-01A | 15.82  | 15.543 | 7.5463 | 15.058 |
| TCGA-DU-7008-01A | 11.907 | 11.618 | NA     | NA     |
| TCGA-DU-7009-01A | 12.335 | 12.335 | NA     | NA     |
| TCGA-DU-7010-01A | 13.342 | 13.053 | 8.9302 | NA     |
| TCGA-DU-7012-01A | 16.412 | 16.141 | 9.8202 | 15.556 |
| TCGA-DU-7013-01A | 17.027 | 16.752 | NA     | 16.252 |
| TCGA-DU-7014-01A | 12.87  | 12.659 | NA     | 8.0678 |
| TCGA-DU-7015-01A | 16.501 | 16.211 | NA     | 15.678 |
| TCGA-DU-7018-01A | 11.061 | 11.257 | 9.9096 | NA     |
| TCGA-DU-7019-01A | 12.119 | 11.83  | NA     | NA     |
| TCGA-DU-7290-01A | 12.979 | 12.69  | 8.4527 | 10.964 |
| TCGA-DU-7292-01A | 16.641 | 16.404 | NA     | 15.749 |
| TCGA-DU-7294-01A | 16.451 | 16.186 | 8.7299 | 15.62  |
| TCGA-DU-7298-01A | 15.929 | 15.677 | NA     | 15.036 |
| TCGA-DU-7299-01A | 13.074 | 12.928 | NA     | NA     |
| TCGA-DU-7300-01A | 12.978 | 12.92  | NA     | 7.8229 |
| TCGA-DU-7301-01A | 12.041 | 11.903 | NA     | 8.8212 |
| TCGA-DU-7302-01A | 16.605 | 16.379 | NA     | 15.926 |
| TCGA-DU-7304-01A | 13.709 | 13.572 | NA     | NA     |
| TCGA-DU-7306-01A | 13.364 | 13.123 | NA     | 12.541 |
| TCGA-DU-7309-01A | 16.576 | 16.363 | NA     | 15.524 |
| TCGA-DU-8158-01A | 11.579 | 11.521 | NA     | 8.0079 |
| TCGA-DU-8161-01A | 10.846 | 11.142 | 9.0183 | 7.2179 |
| TCGA-DU-8162-01A | 15.477 | 15.547 | NA     | 14.77  |
| TCGA-DU-8163-01A | 16.155 | 15.927 | 8.3355 | 15.437 |
| TCGA-DU-8164-01A | 16.538 | 16.291 | 8.6454 | 15.794 |
| TCGA-DU-8165-01A | 15.327 | 15.047 | 6.6812 | 14.628 |
| TCGA-DU-8166-01A | 12.583 | 12.557 | NA     | NA     |
| TCGA-DU-8167-01A | 14.546 | 14.367 | NA     | 13.765 |
| TCGA-DU-8168-01A | 16.696 | 16.424 | NA     | 15.911 |
| TCGA-DU-A5TP-01A | 14.294 | 14.128 | 7.8121 | 13.441 |
| TCGA-DU-A5TR-01A | 13.682 | 13.535 | NA     | 12.366 |
| TCGA-DU-A5TS-01A | 15.828 | 15.539 | NA     | 15.191 |
| TCGA-DU-A5TT-01A | 16.158 | 15.868 | 10.351 | 15.474 |
| TCGA-DU-A5TU-01A | 15.324 | 15.111 | 9.287  | 14.432 |
| TCGA-DU-A5TW-01A | 16.548 | 16.278 | NA     | 15.718 |
| TCGA-DU-A5TY-01A | 15.406 | 15.232 | 9.9926 | 14.541 |
| TCGA-DU-A6S2-01A | 17.382 | 17.11  | NA     | 16.72  |
| TCGA-DU-A6S3-01A | 16.84  | 16.587 | 9.2545 | 16.159 |
| TCGA-DU-A6S6-01A | 17.519 | 17.244 | 9.4575 | 16.838 |
| TCGA-DU-A6S7-01A | 17.266 | 17.004 | NA     | 16.524 |
| TCGA-DU-A6S8-01A | 16.501 | 16.221 | NA     | 15.797 |

|                  |        |        |        |        |
|------------------|--------|--------|--------|--------|
| TCGA-DU-A76K-01A | 16.084 | 15.909 | NA     | 15.423 |
| TCGA-DU-A76L-01A | 17.656 | 17.367 | 10.22  | 16.993 |
| TCGA-DU-A76O-01A | 17.92  | 17.63  | NA     | 17.282 |
| TCGA-DU-A76R-01A | 17.384 | 17.116 | NA     | 16.725 |
| TCGA-DU-A7T6-01A | 16.978 | 16.723 | NA     | 16.251 |
| TCGA-DU-A7T8-01A | 17.04  | 16.764 | 10.417 | 16.295 |
| TCGA-DU-A7TA-01A | 16.643 | 16.407 | NA     | 15.862 |
| TCGA-DU-A7TB-01A | 16.283 | 16.026 | 10.994 | 15.629 |
| TCGA-DU-A7TC-01A | 17.964 | 17.675 | NA     | 17.327 |
| TCGA-DU-A7TD-01A | 14.911 | 14.688 | NA     | 13.985 |
| TCGA-DU-A7TG-01A | 14.081 | 14.419 | 11.529 | 13.206 |
| TCGA-DU-A7TI-01A | 16.03  | 15.85  | NA     | 15.327 |
| TCGA-DU-A7TJ-01A | 17.149 | 16.912 | NA     | 16.511 |
| TCGA-E1-5302-01A | NA     | NA     | NA     | NA     |
| TCGA-E1-5303-01A | 13.931 | 13.684 | 9.0589 | 12.834 |
| TCGA-E1-5304-01A | 15.997 | 15.722 | NA     | 12.509 |
| TCGA-E1-5305-01A | 12.666 | 12.464 | NA     | 9.0312 |
| TCGA-E1-5307-01A | 15.985 | 15.754 | 10.238 | 15.059 |
| TCGA-E1-5311-01A | 15.085 | 14.796 | NA     | NA     |
| TCGA-E1-5318-01A | 13.676 | 13.387 | NA     | NA     |
| TCGA-E1-5319-01A | 15.368 | 15.078 | 9.7319 | 14.567 |
| TCGA-E1-5322-01A | 15.896 | 15.629 | NA     | 14.866 |
| TCGA-E1-A7YD-01A | 13.482 | 13.242 | NA     | 12.767 |
| TCGA-E1-A7YE-01A | 17.068 | 16.8   | NA     | 16.396 |
| TCGA-E1-A7YH-01A | 16.9   | 16.625 | 10.427 | 16.234 |
| TCGA-E1-A7YI-01A | 17.303 | 17.028 | NA     | 16.587 |
| TCGA-E1-A7YJ-01A | 15.492 | 15.202 | NA     | 14.579 |
| TCGA-E1-A7YK-01A | 15.755 | 15.53  | NA     | 14.828 |
| TCGA-E1-A7YL-01A | 15.672 | 15.382 | NA     | 14.803 |
| TCGA-E1-A7YM-01A | 15.081 | 14.99  | 10.165 | 14.357 |
| TCGA-E1-A7YN-01A | 13.669 | 13.448 | NA     | 12.936 |
| TCGA-E1-A7YO-01A | 16.836 | 16.64  | 10.101 | 16.047 |
| TCGA-E1-A7YQ-01A | 14.197 | 14.167 | 10.324 | 13.27  |
| TCGA-E1-A7YS-01A | 16.918 | 16.661 | NA     | 16.18  |
| TCGA-E1-A7YU-01A | 15.095 | 15.196 | NA     | 14.323 |
| TCGA-E1-A7YV-01A | 14.837 | 14.688 | NA     | 14.043 |
| TCGA-E1-A7YW-01A | 16.915 | 16.685 | NA     | 16.216 |
| TCGA-E1-A7YY-01A | 16.219 | 16.152 | NA     | 15.541 |
| TCGA-E1-A7Z2-01A | 15.311 | 15.275 | NA     | 14.432 |
| TCGA-E1-A7Z3-01A | 16.307 | 16.157 | NA     | 15.619 |
| TCGA-E1-A7Z4-01A | 13.531 | 13.488 | NA     | 12.789 |
| TCGA-E1-A7Z6-01A | 14.315 | 14.449 | 9.0281 | 13.54  |
| TCGA-EZ-7264-01A | 12.801 | 12.759 | NA     | 8.1684 |
| TCGA-F6-A8O3-01A | 11.38  | 11.313 | 9.9657 | 9.7435 |
| TCGA-F6-A8O4-01A | 10.307 | 10.755 | 6.5844 | 8.7653 |

|                  |        |        |        |        |
|------------------|--------|--------|--------|--------|
| TCGA-FG-5962-01B | 11.949 | 13.144 | NA     | 7.0002 |
| TCGA-FG-5963-01A | 13.92  | 13.644 | 4.6792 | 13.27  |
| TCGA-FG-5964-01A | 14.589 | 14.614 | NA     | 13.879 |
| TCGA-FG-5965-01B | 16.31  | 16.048 | NA     | 15.594 |
| TCGA-FG-6688-01A | 10.163 | 10.78  | NA     | 6.54   |
| TCGA-FG-6689-01A | 12.269 | 12.395 | NA     | 7.7316 |
| TCGA-FG-6690-01A | 12.654 | 12.365 | NA     | NA     |
| TCGA-FG-6691-01A | 13.36  | 13.204 | 8.5795 | 7.7749 |
| TCGA-FG-6692-01A | 12.836 | 12.572 | 9.7349 | NA     |
| TCGA-FG-7634-01A | 11.81  | 11.742 | NA     | 7.013  |
| TCGA-FG-7636-01A | 16.313 | 16.076 | NA     | 15.398 |
| TCGA-FG-7637-01A | 16.529 | 16.256 | NA     | 15.738 |
| TCGA-FG-7638-01B | 12.042 | 12.2   | NA     | 7.9507 |
| TCGA-FG-7641-01B | 13.114 | 12.918 | NA     | 9.157  |
| TCGA-FG-7643-01A | 16.181 | 15.957 | 9.9265 | 15.384 |
| TCGA-FG-8181-01A | 12.183 | 12.408 | 6.9714 | 10.061 |
| TCGA-FG-8182-01A | 12.121 | 12.108 | 8.0486 | 8.2405 |
| TCGA-FG-8185-01A | 14.366 | 14.149 | 7.9418 | 8.1337 |
| TCGA-FG-8186-01A | 11.928 | 11.816 | NA     | 6.7802 |
| TCGA-FG-8187-01A | 12.858 | 13.003 | 9.4055 | 8.0166 |
| TCGA-FG-8188-01A | 15.21  | 14.961 | NA     | 13.6   |
| TCGA-FG-8189-01B | 15.839 | 16.305 | NA     | 14.661 |
| TCGA-FG-8191-01A | 11.384 | 11.399 | 7.4741 | 7.6657 |
| TCGA-FG-A4MU-01B | 15.658 | 15.379 | 8.8084 | 14.917 |
| TCGA-FG-A4MW-01A | 16.531 | 16.256 | NA     | 15.804 |
| TCGA-FG-A4MX-01A | 13.372 | 13.227 | 9.2962 | 11.735 |
| TCGA-FG-A4MY-01A | 14.396 | 14.139 | NA     | 12.856 |
| TCGA-FG-A60J-01A | 16.247 | 15.996 | NA     | 15.442 |
| TCGA-FG-A60K-01A | 17.317 | 17.028 | NA     | 16.588 |
| TCGA-FG-A60L-01A | 16.634 | 16.355 | NA     | 15.902 |
| TCGA-FG-A6IZ-01A | 14.079 | 13.978 | NA     | 13.337 |
| TCGA-FG-A6J1-01A | 17.05  | 16.766 | 8.9753 | 16.355 |
| TCGA-FG-A6J3-01A | 13.051 | 12.899 | NA     | 11.092 |
| TCGA-FG-A70Y-01A | 16.949 | 16.715 | NA     | 16.255 |
| TCGA-FG-A70Z-01A | 15.624 | 15.351 | NA     | 14.898 |
| TCGA-FG-A710-01A | 15.412 | 15.255 | 10.882 | 14.431 |
| TCGA-FG-A711-01A | 16.61  | 16.368 | NA     | 15.794 |
| TCGA-FG-A713-01A | 15.734 | 15.859 | NA     | 14.94  |
| TCGA-FG-A87N-01A | 17.057 | 16.778 | NA     | 16.4   |
| TCGA-FG-A87Q-01A | 16.258 | 15.994 | NA     | 15.566 |
| TCGA-FN-7833-01A | 16.339 | 16.094 | NA     | 15.525 |
| TCGA-HT-7467-01A | 17.288 | 17.002 | NA     | 16.647 |
| TCGA-HT-7468-01A | 11.858 | 11.568 | 8.2245 | 8.4166 |
| TCGA-HT-7469-01A | 16.629 | 16.358 | NA     | 15.748 |
| TCGA-HT-7470-01A | 16.538 | 16.345 | NA     | 15.832 |

|                  |        |        |        |        |
|------------------|--------|--------|--------|--------|
| TCGA-HT-7471-01A | 16.619 | 16.362 | NA     | 15.965 |
| TCGA-HT-7472-01A | 11.727 | 11.701 | NA     | 9.7691 |
| TCGA-HT-7473-01A | 16.921 | 16.637 | 9.077  | 16.18  |
| TCGA-HT-7474-01A | 11.917 | 12.28  | NA     | 8.4764 |
| TCGA-HT-7475-01A | 12.527 | 12.294 | NA     | NA     |
| TCGA-HT-7476-01A | 17.17  | 16.892 | NA     | 16.423 |
| TCGA-HT-7477-01B | 16.776 | 16.486 | NA     | 16.099 |
| TCGA-HT-7478-01A | 12.293 | 12.003 | NA     | NA     |
| TCGA-HT-7479-01A | 16.5   | 16.254 | NA     | 15.724 |
| TCGA-HT-7480-01A | 16.175 | 15.886 | NA     | 15.538 |
| TCGA-HT-7481-01A | 16.709 | 16.435 | NA     | 15.925 |
| TCGA-HT-7482-01A | 12.908 | 12.673 | NA     | NA     |
| TCGA-HT-7483-01A | 12.565 | 12.523 | NA     | 7.9328 |
| TCGA-HT-7485-01A | 16.793 | 16.51  | NA     | 16.063 |
| TCGA-HT-7601-01A | 16.221 | 15.973 | NA     | 15.462 |
| TCGA-HT-7602-01A | 12.793 | 12.918 | 9.7943 | 7.4089 |
| TCGA-HT-7603-01A | 15.864 | 15.803 | 10.405 | 15.057 |
| TCGA-HT-7604-01A | 7.8317 | 9.8593 | NA     | NA     |
| TCGA-HT-7605-01A | 16.53  | 16.309 | NA     | 15.732 |
| TCGA-HT-7606-01A | 13.555 | 13.265 | 9.4048 | 8.599  |
| TCGA-HT-7607-01A | 12.945 | 13.392 | 9.2098 | NA     |
| TCGA-HT-7608-01A | 11.484 | 13.309 | NA     | NA     |
| TCGA-HT-7609-01A | 12.858 | 12.7   | 8.6392 | NA     |
| TCGA-HT-7610-01A | 16.658 | 16.433 | NA     | 15.959 |
| TCGA-HT-7611-01A | 16.654 | 16.396 | NA     | 15.957 |
| TCGA-HT-7616-01A | 12.384 | 12.152 | NA     | NA     |
| TCGA-HT-7620-01A | 11.664 | 11.746 | NA     | 7.9445 |
| TCGA-HT-7676-01A | 12.244 | 11.955 | 6.727  | NA     |
| TCGA-HT-7677-01A | 16.645 | 16.37  | NA     | 15.931 |
| TCGA-HT-7680-01A | 14.985 | 14.763 | 8.4588 | 14.291 |
| TCGA-HT-7681-01A | 11.957 | 11.793 | NA     | 7.8661 |
| TCGA-HT-7684-01A | 11.771 | 11.589 | NA     | 7.4413 |
| TCGA-HT-7686-01A | 11.923 | 11.704 | NA     | 7.9688 |
| TCGA-HT-7687-01A | 11.069 | 10.78  | 7.2482 | 6.4479 |
| TCGA-HT-7688-01A | 15.592 | 15.695 | 8.997  | 14.772 |
| TCGA-HT-7689-01A | 11.543 | 11.533 | 7.9109 | 7.108  |
| TCGA-HT-7690-01A | 11.932 | 11.713 | NA     | 6.9839 |
| TCGA-HT-7691-01A | 11.12  | 11.266 | NA     | 6.4114 |
| TCGA-HT-7692-01A | 15.204 | 14.935 | 9.2067 | 14.441 |
| TCGA-HT-7693-01A | 15.769 | 15.527 | 9.8252 | 15.039 |
| TCGA-HT-7694-01A | 14.011 | 13.823 | NA     | 13.081 |
| TCGA-HT-7695-01A | 17.091 | 16.83  | NA     | 16.377 |
| TCGA-HT-7854-01A | 15.514 | 15.348 | NA     | 14.684 |
| TCGA-HT-7855-01A | 16.198 | 15.966 | NA     | 15.115 |
| TCGA-HT-7856-01A | 12.649 | 12.859 | 9.7843 | 8.6569 |

|                  |        |        |        |        |
|------------------|--------|--------|--------|--------|
| TCGA-HT-7857-01A | 14.416 | 14.133 | 8.0436 | 13.578 |
| TCGA-HT-7858-01A | 10.747 | 10.56  | 6.1808 | 5.3882 |
| TCGA-HT-7860-01A | 16.433 | 16.167 | NA     | 15.714 |
| TCGA-HT-7873-01B | 17.634 | 17.347 | NA     | 16.937 |
| TCGA-HT-7874-01A | 12.768 | 13.137 | 10.276 | 8.8854 |
| TCGA-HT-7875-01A | 17.192 | 16.912 | 9.0474 | 16.471 |
| TCGA-HT-7877-01A | 17.38  | 17.106 | NA     | 16.657 |
| TCGA-HT-7879-01A | 17.026 | 16.742 | NA     | 16.273 |
| TCGA-HT-7880-01A | 17.275 | 16.991 | NA     | 16.555 |
| TCGA-HT-7881-01A | 8.9751 | 10.558 | 7.5649 | 6.7632 |
| TCGA-HT-7882-01A | 15.891 | 15.63  | NA     | 15.104 |
| TCGA-HT-7884-01B | 17.705 | 17.425 | NA     | 17.011 |
| TCGA-HT-7902-01A | 10.228 | 9.9388 | NA     | 6.2861 |
| TCGA-HT-8010-01A | 16.657 | 16.47  | NA     | 15.671 |
| TCGA-HT-8011-01A | 15.43  | 15.229 | 9.2983 | 14.396 |
| TCGA-HT-8012-01A | 16.249 | 16.006 | NA     | 15.429 |
| TCGA-HT-8013-01A | 12.856 | 12.773 | NA     | 7.5257 |
| TCGA-HT-8015-01B | 15.91  | 15.71  | NA     | 15.177 |
| TCGA-HT-8018-01A | 11.211 | 11.69  | NA     | 8.6292 |
| TCGA-HT-8019-01A | 14.48  | 14.72  | NA     | 13.668 |
| TCGA-HT-8104-01A | 17.468 | 17.178 | NA     | 16.78  |
| TCGA-HT-8105-01A | 12.752 | 12.835 | NA     | NA     |
| TCGA-HT-8107-01A | 11.773 | 11.747 | NA     | 7.82   |
| TCGA-HT-8108-01A | 17.404 | 17.127 | NA     | 16.515 |
| TCGA-HT-8109-01A | 16.947 | 16.7   | 8.3403 | 16.25  |
| TCGA-HT-8110-01A | 13.63  | 13.46  | NA     | 12.881 |
| TCGA-HT-8111-01A | 10.576 | 10.534 | NA     | 5.9606 |
| TCGA-HT-8113-01A | 12.033 | 13.066 | NA     | NA     |
| TCGA-HT-8114-01A | 16.124 | 15.848 | NA     | 15.339 |
| TCGA-HT-8558-01A | 10.109 | 10.819 | NA     | NA     |
| TCGA-HT-8563-01A | 15.036 | 14.758 | 5.8758 | 14.334 |
| TCGA-HT-8564-01A | 11.039 | 10.75  | 6.8286 | 6.0307 |
| TCGA-HT-A4DS-01A | 16.739 | 16.462 | NA     | 15.856 |
| TCGA-HT-A4DV-01A | 16.315 | 16.05  | NA     | 15.525 |
| TCGA-HT-A5R5-01A | 16.37  | 16.104 | NA     | 15.672 |
| TCGA-HT-A5R7-01A | 17.288 | 16.998 | NA     | 16.617 |
| TCGA-HT-A5R9-01A | 14.11  | 13.82  | NA     | 13.473 |
| TCGA-HT-A5RA-01A | 17.352 | 17.062 | NA     | 16.689 |
| TCGA-HT-A5RB-01A | 17.08  | 16.808 | NA     | 16.351 |
| TCGA-HT-A5RC-01A | 16.063 | 15.797 | NA     | 15.246 |
| TCGA-HT-A614-01A | 17.766 | 17.476 | NA     | 17.128 |
| TCGA-HT-A615-01A | 17.021 | 16.748 | NA     | 16.352 |
| TCGA-HT-A616-01A | 15.791 | 15.501 | NA     | 15.086 |
| TCGA-HT-A617-01A | 15.599 | 15.344 | NA     | 14.852 |
| TCGA-HT-A618-01A | 14.631 | 14.37  | NA     | 13.35  |

|                  |        |        |        |        |
|------------------|--------|--------|--------|--------|
| TCGA-HT-A619-01A | 17.63  | 17.34  | NA     | 16.956 |
| TCGA-HT-A61A-01A | 17.436 | 17.147 | NA     | 16.723 |
| TCGA-HT-A61B-01A | 17.301 | 17.017 | NA     | 16.61  |
| TCGA-HT-A61C-01A | 17.152 | 16.862 | NA     | 16.454 |
| TCGA-HT-A74H-01A | 17.14  | 16.873 | NA     | 16.456 |
| TCGA-HT-A74K-01A | 17.216 | 16.942 | NA     | 16.522 |
| TCGA-HT-A74L-01A | 17.522 | 17.237 | NA     | 16.879 |
| TCGA-HT-A74O-01A | 16.579 | 16.346 | NA     | 15.831 |
| TCGA-HW-7486-01A | 11.632 | 11.588 | 8.6352 | 6.2582 |
| TCGA-HW-7487-01A | 12.122 | 11.832 | NA     | NA     |
| TCGA-HW-7489-01A | 16.151 | 15.891 | NA     | 15.268 |
| TCGA-HW-7490-01A | NA     | NA     | NA     | NA     |
| TCGA-HW-7491-01A | 11.652 | 11.45  | 7.8277 | 7.0251 |
| TCGA-HW-7493-01A | 15.069 | 14.89  | NA     | 14.208 |
| TCGA-HW-7495-01A | 12.851 | 12.636 | NA     | NA     |
| TCGA-HW-8319-01A | 17.593 | 17.309 | NA     | 16.836 |
| TCGA-HW-8320-01A | 10.401 | 10.111 | 7.4081 | NA     |
| TCGA-HW-8321-01A | 16.668 | 16.423 | 8.5156 | 15.933 |
| TCGA-HW-8322-01A | 10.634 | 10.497 | 7.6408 | 6.8388 |
| TCGA-HW-A5KJ-01A | 13.503 | 13.649 | NA     | 10.778 |
| TCGA-HW-A5KK-01A | 14.715 | 14.473 | NA     | 13.815 |
| TCGA-HW-A5KL-01A | 17.203 | 16.914 | 9.9071 | 16.566 |
| TCGA-HW-A5KM-01A | 14.176 | 13.947 | NA     | 13.412 |
| TCGA-IK-7675-01A | 12.444 | 12.154 | 8.4477 | 7.6434 |
| TCGA-IK-8125-01A | 12.455 | 12.377 | NA     | NA     |
| TCGA-KT-A74X-01A | 16.439 | 16.2   | NA     | 15.695 |
| TCGA-KT-A7W1-01A | 16.919 | 16.678 | NA     | 16.144 |
| TCGA-P5-A5ET-01A | 15.829 | 15.623 | NA     | 15.083 |
| TCGA-P5-A5EU-01A | 16.335 | 16.095 | 11.258 | 15.509 |
| TCGA-P5-A5EV-01A | 16.07  | 15.843 | 10.019 | 15.21  |
| TCGA-P5-A5EW-01A | 16.318 | 16.059 | 9.9349 | 15.412 |
| TCGA-P5-A5EX-01A | 13.745 | 13.584 | 7.1829 | 12.995 |
| TCGA-P5-A5EY-01A | 14.588 | 14.414 | NA     | 13.588 |
| TCGA-P5-A5EZ-01A | 14.111 | 13.947 | NA     | 12.216 |
| TCGA-P5-A5F0-01A | 16.899 | 16.618 | NA     | 16.227 |
| TCGA-P5-A5F1-01A | 15.997 | 15.708 | NA     | 15.36  |
| TCGA-P5-A5F2-01A | 14.34  | 14.273 | NA     | 12.577 |
| TCGA-P5-A5F4-01A | 16.065 | 15.775 | NA     | 15.428 |
| TCGA-P5-A5F6-01A | 15.238 | 14.959 | NA     | 14.513 |
| TCGA-P5-A72U-01A | 16.824 | 16.551 | NA     | 16.169 |
| TCGA-P5-A72W-01A | 15.863 | 15.609 | NA     | 15.103 |
| TCGA-P5-A72X-01A | 16.688 | 16.433 | NA     | 15.942 |
| TCGA-P5-A72Z-01A | 17.71  | 17.445 | 10.429 | 17.03  |
| TCGA-P5-A730-01A | 15.95  | 15.69  | NA     | 15.237 |
| TCGA-P5-A731-01A | 15.724 | 15.547 | NA     | 14.963 |

|                  |        |        |        |        |
|------------------|--------|--------|--------|--------|
| TCGA-P5-A733-01A | 15.684 | 15.515 | NA     | 14.729 |
| TCGA-P5-A735-01A | 17.283 | 16.994 | NA     | 16.646 |
| TCGA-P5-A736-01A | 16.629 | 16.369 | 11.185 | 15.869 |
| TCGA-P5-A737-01A | 14.041 | 13.878 | 9.0307 | 13.159 |
| TCGA-P5-A77W-01A | 16.792 | 16.517 | 10.72  | 16.111 |
| TCGA-P5-A77X-01A | 16.639 | 16.366 | 9.3516 | 15.926 |
| TCGA-P5-A780-01A | 16.833 | 16.553 | 9.6476 | 16.169 |
| TCGA-P5-A781-01A | 16.507 | 16.299 | NA     | 15.749 |
| TCGA-QH-A65R-01A | 14.329 | 14.117 | 9.7456 | 13.551 |
| TCGA-QH-A65S-01A | 15.816 | 15.527 | NA     | 15.058 |
| TCGA-QH-A65V-01A | 14.567 | 14.377 | NA     | 13.582 |
| TCGA-QH-A65X-01A | 16.776 | 16.487 | NA     | 16.081 |
| TCGA-QH-A65Z-01A | 15.817 | 15.528 | 10.465 | 15.083 |
| TCGA-QH-A6CS-01A | 14.984 | 14.739 | 10.155 | 14.047 |
| TCGA-QH-A6CU-01A | 14.626 | 14.432 | NA     | 13.3   |
| TCGA-QH-A6CV-01A | 16.186 | 15.924 | NA     | 15.52  |
| TCGA-QH-A6CX-01A | 14.534 | 14.269 | NA     | 13.847 |
| TCGA-QH-A6CY-01A | 15.172 | 15.016 | NA     | 14.418 |
| TCGA-QH-A6CZ-01A | 14.864 | 14.575 | NA     | 14.227 |
| TCGA-QH-A6X3-01A | 16.829 | 16.585 | NA     | 16.051 |
| TCGA-QH-A6X4-01A | 17.898 | 17.608 | NA     | 17.26  |
| TCGA-QH-A6X5-01A | 15.376 | 15.15  | NA     | 14.672 |
| TCGA-QH-A6X8-01A | 17.308 | 17.035 | NA     | 16.622 |
| TCGA-QH-A6X9-01A | 16.718 | 16.514 | 9.2755 | 15.958 |
| TCGA-QH-A6XA-01A | 15.626 | 15.436 | 8.9909 | 14.839 |
| TCGA-QH-A6XC-01A | 16.551 | 16.324 | NA     | 15.83  |
| TCGA-QH-A86X-01A | 16.701 | 16.446 | 8.9545 | 16.021 |
| TCGA-QH-A870-01A | 15.469 | 15.261 | NA     | 14.789 |
| TCGA-R8-A6MK-01A | 15.604 | 15.386 | NA     | 14.757 |
| TCGA-R8-A6ML-01A | 16.183 | 15.975 | 10.246 | 15.459 |
| TCGA-R8-A6MO-01A | 15.904 | 15.615 | NA     | 15.156 |
| TCGA-R8-A6YH-01A | 17.228 | 17.007 | NA     | 16.443 |
| TCGA-R8-A73M-01A | 17.036 | 16.755 | NA     | 16.284 |
| TCGA-RY-A83X-01A | 17.22  | 16.931 | NA     | 16.516 |
| TCGA-RY-A83Y-01A | 15.888 | 15.632 | NA     | 15.181 |
| TCGA-RY-A83Z-01A | 16.978 | 16.695 | NA     | 16.302 |
| TCGA-RY-A840-01A | 17.19  | 16.936 | NA     | 16.484 |
| TCGA-RY-A843-01A | 15.526 | 15.34  | NA     | 14.835 |
| TCGA-RY-A845-01A | 17.455 | 17.174 | NA     | 16.774 |
| TCGA-RY-A847-01A | 10.709 | 10.779 | 5.1902 | 9.7368 |
| TCGA-S9-A6TS-01A | 17.26  | 16.971 | NA     | 16.623 |
| TCGA-S9-A6TU-01A | 15.872 | 15.583 | 10.674 | 15.188 |
| TCGA-S9-A6TV-01A | 17.28  | 17.01  | NA     | 16.602 |
| TCGA-S9-A6TW-01A | 17.356 | 17.071 | NA     | 16.674 |
| TCGA-S9-A6TX-01A | 16.987 | 16.709 | NA     | 16.282 |



|                  |        |        |        |        |
|------------------|--------|--------|--------|--------|
| TCGA-S9-A6TY-01A | 16.804 | 16.541 | NA     | 15.974 |
| TCGA-S9-A6TZ-01A | 16.579 | 16.338 | NA     | 15.841 |
| TCGA-S9-A6U0-01A | 17.111 | 16.837 | NA     | 16.428 |
| TCGA-S9-A6U1-01A | 16.316 | 16.026 | NA     | 15.678 |
| TCGA-S9-A6U2-01A | 16.384 | 16.137 | NA     | 15.514 |
| TCGA-S9-A6U5-01A | 15.261 | 14.971 | NA     | 14.623 |
| TCGA-S9-A6U6-01A | 15.404 | 15.232 | NA     | 14.206 |
| TCGA-S9-A6U8-01A | 15.781 | 15.591 | NA     | 14.795 |
| TCGA-S9-A6U9-01A | 16.268 | 15.978 | NA     | 15.45  |
| TCGA-S9-A6UA-01A | 16.485 | 16.21  | NA     | 15.818 |
| TCGA-S9-A6UB-01A | 16.587 | 16.324 | 12.003 | 15.839 |
| TCGA-S9-A6WD-01A | 15.91  | 15.647 | NA     | 15.162 |
| TCGA-S9-A6WE-01A | 17.039 | 16.763 | NA     | 16.36  |
| TCGA-S9-A6WG-01A | 16.033 | 15.872 | NA     | 15.336 |
| TCGA-S9-A6WH-01A | 16.223 | 15.973 | NA     | 15.323 |
| TCGA-S9-A6WI-01A | 14.588 | 14.823 | 11.759 | 13.199 |
| TCGA-S9-A6WL-01A | 16.757 | 16.518 | NA     | 16.094 |
| TCGA-S9-A6WM-01A | 15.63  | 15.511 | NA     | 14.851 |
| TCGA-S9-A6WN-01A | 14.475 | 14.219 | NA     | 13.803 |
| TCGA-S9-A6WO-01A | 17.167 | 16.888 | NA     | 16.462 |
| TCGA-S9-A6WP-01A | 17.096 | 16.833 | NA     | 16.29  |
| TCGA-S9-A6WQ-01A | 16.839 | 16.567 | NA     | 16.165 |
| TCGA-S9-A7IQ-01A | 15.376 | 15.651 | NA     | 14.675 |
| TCGA-S9-A7IS-01A | 17.159 | 16.89  | 10.201 | 16.469 |
| TCGA-S9-A7IX-01A | 15.842 | 15.626 | 9.1692 | 15.046 |
| TCGA-S9-A7IY-01A | 16.63  | 16.402 | NA     | 15.927 |
| TCGA-S9-A7IZ-01A | 16.049 | 15.907 | NA     | 15.249 |
| TCGA-S9-A7J0-01A | 17.531 | 17.241 | 10.178 | 16.846 |
| TCGA-S9-A7J1-01A | 17.155 | 16.9   | NA     | 16.508 |
| TCGA-S9-A7J2-01A | 17.439 | 17.176 | NA     | 16.775 |
| TCGA-S9-A7J3-01A | 17.984 | 17.694 | NA     | 17.346 |
| TCGA-S9-A7QW-01A | 16.978 | 16.768 | NA     | 16.298 |
| TCGA-S9-A7QX-01A | 15.684 | 15.395 | NA     | 15.047 |
| TCGA-S9-A7QY-01A | 16.657 | 16.411 | NA     | 15.904 |
| TCGA-S9-A7QZ-01A | 17.703 | 17.417 | 10.083 | 17.046 |
| TCGA-S9-A7R1-01A | 14.922 | 14.74  | 10.393 | 13.584 |
| TCGA-S9-A7R2-01A | 14.563 | 14.392 | NA     | 13.798 |
| TCGA-S9-A7R3-01A | 17.36  | 17.12  | 10.966 | 16.628 |
| TCGA-S9-A7R4-01A | 14.974 | 14.754 | 9.2156 | 14.021 |
| TCGA-S9-A7R7-01A | 16.323 | 16.034 | NA     | 15.583 |
| TCGA-S9-A7R8-01A | 14.963 | 14.83  | NA     | 14.196 |
| TCGA-S9-A89V-01A | 14.658 | 14.458 | 8.2779 | 13.966 |
| TCGA-S9-A89Z-01A | 15.735 | 15.467 | 8.8314 | 15.032 |
| TCGA-TM-A7C3-01A | 15.306 | 15.016 | NA     | 14.417 |
| TCGA-TM-A7C4-01A | 16.769 | 16.538 | NA     | 16.07  |

|                  |        |        |        |        |
|------------------|--------|--------|--------|--------|
| TCGA-TM-A7C5-01A | 16.868 | 16.604 | NA     | 16.179 |
| TCGA-TM-A7CA-01A | 16.733 | 16.465 | NA     | 15.887 |
| TCGA-TM-A7CF-01A | 15.571 | 15.413 | 10.35  | 14.751 |
| TCGA-TM-A84B-01A | 16.615 | 16.366 | NA     | 15.849 |
| TCGA-TM-A84C-01A | 15.502 | 15.269 | NA     | 14.721 |
| TCGA-TM-A84F-01A | 16.611 | 16.35  | NA     | 15.869 |
| TCGA-TM-A84G-01A | 17.419 | 17.129 | NA     | 16.754 |
| TCGA-TM-A84H-01A | 17.136 | 16.88  | NA     | 16.452 |
| TCGA-TM-A84I-01A | 16.809 | 16.532 | NA     | 16.055 |
| TCGA-TM-A84J-01A | 17.645 | 17.362 | 9.4772 | 16.99  |
| TCGA-TM-A84L-01A | 17.476 | 17.193 | NA     | 16.81  |
| TCGA-TM-A84M-01A | 17.08  | 16.807 | NA     | 16.392 |
| TCGA-TM-A84O-01A | 14.139 | 14.026 | NA     | 13.3   |
| TCGA-TM-A84Q-01A | 17.23  | 16.94  | NA     | 16.592 |
| TCGA-TM-A84R-01A | 15.543 | 15.548 | NA     | 14.759 |
| TCGA-TM-A84S-01A | 16.255 | 16.011 | NA     | 15.497 |
| TCGA-TM-A84T-01A | 17.391 | 17.113 | NA     | 16.721 |
| TCGA-TQ-A7RF-01A | 14.741 | 14.53  | NA     | 13.888 |
| TCGA-TQ-A7RG-01A | 17.17  | 16.924 | NA     | 16.465 |
| TCGA-TQ-A7RH-01A | 17.148 | 16.887 | NA     | 16.487 |
| TCGA-TQ-A7RI-01A | 17.576 | 17.303 | NA     | 16.85  |
| TCGA-TQ-A7RJ-01A | 17.208 | 16.953 | NA     | 16.474 |
| TCGA-TQ-A7RK-01A | 17.476 | 17.199 | NA     | 16.826 |
| TCGA-TQ-A7RM-01A | 17.761 | 17.472 | NA     | 17.071 |
| TCGA-TQ-A7RN-01A | 17.596 | 17.307 | NA     | 16.915 |
| TCGA-TQ-A7RO-01A | 17.198 | 16.927 | NA     | 16.56  |
| TCGA-TQ-A7RP-01A | 15.355 | 15.12  | NA     | 14.642 |
| TCGA-TQ-A7RQ-01A | 17.551 | 17.262 | 11.418 | 16.839 |
| TCGA-TQ-A7RR-01A | 17.518 | 17.269 | NA     | 16.822 |
| TCGA-TQ-A7RS-01A | 16.875 | 16.636 | NA     | 16.114 |
| TCGA-TQ-A7RV-01A | 17.782 | 17.492 | NA     | 17.144 |
| TCGA-TQ-A7RW-01A | 17.162 | 16.872 | NA     | 16.504 |
| TCGA-TQ-A8XE-01A | 17.377 | 17.106 | NA     | 16.617 |
| TCGA-VM-A8C8-01A | 17.639 | 17.374 | 8.3867 | 16.976 |
| TCGA-VM-A8C9-01A | 14.357 | 14.1   | NA     | 13.709 |
| TCGA-VM-A8CA-01A | 15.679 | 15.511 | NA     | 14.946 |
| TCGA-VM-A8CB-01A | 17.226 | 16.959 | NA     | 16.449 |
| TCGA-VM-A8CD-01A | 16.716 | 16.445 | NA     | 15.953 |
| TCGA-VM-A8CE-01A | 17.288 | 17.044 | NA     | 16.621 |
| TCGA-VM-A8CF-01A | 15.406 | 15.289 | NA     | 14.406 |
| TCGA-VM-A8CH-01A | 16.573 | 16.32  | NA     | 15.86  |
| TCGA-VV-A829-01A | 14.668 | 14.428 | NA     | 13.928 |
| TCGA-VV-A86M-01A | 16.213 | 15.941 | 10.01  | 15.391 |
| TCGA-VW-A7QS-01A | 16.487 | 16.218 | NA     | 15.716 |
| TCGA-VW-A8FI-01A | 14.644 | 14.384 | 8.2186 | 13.961 |

|                  |        |        |        |        |
|------------------|--------|--------|--------|--------|
| TCGA-W9-A837-01A | 15.608 | 15.341 | 9.7573 | 14.831 |
| TCGA-WH-A86K-01A | 15.725 | 15.459 | NA     | 14.955 |
| TCGA-WY-A858-01A | 14.926 | 14.664 | 8.4276 | 14.155 |
| TCGA-WY-A859-01A | 13.513 | 13.96  | 9.7774 | 12.554 |
| TCGA-WY-A85A-01A | 16.867 | 16.617 | 13.462 | 16.081 |
| TCGA-WY-A85B-01A | 15.925 | 15.635 | 12.689 | 15.287 |
| TCGA-WY-A85C-01A | 15.52  | 15.252 | NA     | 14.815 |
| TCGA-WY-A85D-01A | 15.151 | 15.106 | NA     | 14.324 |
| TCGA-WY-A85E-01A | 14.735 | 14.552 | NA     | 13.982 |
| TCGA-06-0675-11A | 16.979 | 16.704 | NA     | 16.313 |
| TCGA-06-0678-11A | 17.225 | 17.001 | NA     | 16.519 |
| TCGA-06-0680-11A | 16.917 | 16.761 | NA     | 16.237 |
| TCGA-06-0681-11A | 16.81  | 16.584 | NA     | 16.123 |
| TCGA-06-AABW-11A | 15.115 | 15.188 | NA     | 14.425 |

**Availability of data:** The primary clinical and molecular pathology characteristics parameters in glioma samples are available from the corresponding author on reasonable request.
